# Supplementary material
Source: PubMed Central journal article supplement (PMC5517669)
Supplement: HESR-52-1264-s005.pdf [file HESR-52-1264-s005.pdf]

**Appendix Table 1: Classification of all ED Visits\* Before and After Update**

|             | Unclassified |            | Emergent EDNNP <sup>†</sup> |       | Emergent EDNP <sup>†</sup> |       | Emergent PCT <sup>†</sup> |       | Non-Emergent |       | Injury Related |       | Mental Health |       | Alcohol Related |       | Drug Related |       |
|-------------|--------------|------------|-----------------------------|-------|----------------------------|-------|---------------------------|-------|--------------|-------|----------------|-------|---------------|-------|-----------------|-------|--------------|-------|
|             | Before       | After      | Before                      | After | Before                     | After | Before                    | After | Before       | After | Before         | After | Before        | After | Before          | After | Before       | After |
| <b>2006</b> | <b>11.2</b>  | <b>8.6</b> | 12.8                        | 13.6  | 7.4                        | 8.0   | 20.8                      | 21.6  | 19.8         | 20.1  | 24.5           | 24.6  | 2.3           | 2.4   | 0.9             | 0.9   | 0.2          | 0.2   |
| <b>2007</b> | <b>12.7</b>  | <b>8.9</b> | 12.8                        | 14.2  | 7.2                        | 7.9   | 20.7                      | 21.8  | 19.1         | 19.6  | 24.0           | 24.0  | 2.4           | 2.4   | 1.0             | 1.0   | 0.2          | 0.2   |
| <b>2008</b> | <b>13.5</b>  | <b>8.9</b> | 13.0                        | 14.8  | 6.9                        | 7.8   | 20.6                      | 21.9  | 19.0         | 19.6  | 23.2           | 23.2  | 2.5           | 2.6   | 1.0             | 1.0   | 0.2          | 0.2   |
| <b>2009</b> | <b>14.8</b>  | <b>8.7</b> | 12.7                        | 14.9  | 6.9                        | 7.9   | 20.9                      | 22.6  | 19.0         | 20.1  | 22.0           | 22.0  | 2.5           | 2.6   | 1.0             | 1.0   | 0.2          | 0.2   |
| <b>2010</b> | <b>14.9</b>  | <b>8.8</b> | 12.9                        | 15.3  | 6.7                        | 7.7   | 20.2                      | 21.9  | 19.0         | 19.9  | 22.4           | 22.4  | 2.6           | 2.7   | 1.1             | 1.1   | 0.3          | 0.3   |
| <b>2011</b> | <b>15.4</b>  | <b>8.9</b> | 13.0                        | 15.6  | 6.7                        | 7.7   | 20.3                      | 22.1  | 18.8         | 19.8  | 21.9           | 21.9  | 2.5           | 2.6   | 1.1             | 1.1   | 0.3          | 0.3   |
| <b>2012</b> | <b>15.5</b>  | <b>8.9</b> | 13.0                        | 15.6  | 6.6                        | 7.6   | 20.5                      | 22.3  | 19.1         | 20.2  | 21.3           | 21.4  | 2.6           | 2.7   | 1.1             | 1.1   | 0.3          | 0.3   |

\*Calculated from the Nationwide Emergency Department Sample (NEDS) using visit weights on all ED visits in the NEDS by year (as shown in Table 1).

<sup>†</sup>EDNNP, ED care needed and not preventable/avoidable; EDNP, ED care needed and preventable/avoidable; PCT, primary care treatable.
